# Supplementary material
Source: PubMed Central journal article supplement (PMC2930458)
Supplement: 1009433107_pnas.201009433SI.pdf [file 1009433107_pnas.201009433SI.pdf]

# Supporting Information

Zhou et al. 10.1073/pnas.1009433107

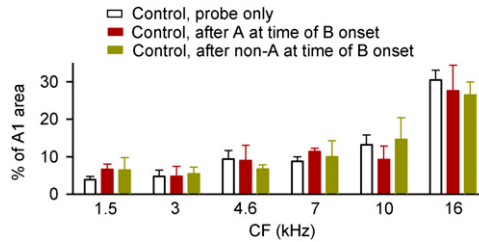

**Fig. S1.** Percent cortical areas tuned to different frequencies for control rats recorded under different stimulus conditions. Error bars represent mean  $\pm$  SEM. No significant differences were found for percent A1 areas determined under different stimulus conditions at each frequency band (ANOVA, all  $P > 0.4$ ).

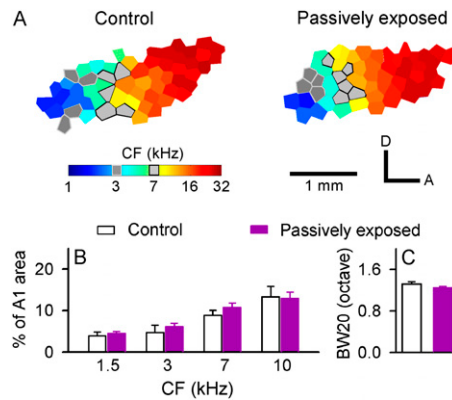

**Fig. S2.** Cortical frequency representation and response specificity for passively exposed rats ( $n = 4$ ) measured using a conventional mapping procedure compared with control rats ( $n = 6$ ). (A) Representative auditory cortical CF maps. Dark or light-gray polygons indicate recording sites with CF values of 3 or 7 kHz  $\pm$  0.25 octaves. (B) Percent cortical area with a CF range of 0.5 octaves centered at 1.5, 3, 7, or 10 kHz. Error bars represent mean  $\pm$  SEM. (C) Average BW20.
